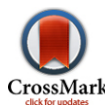

## Correction

# Correction: Toll-Like Receptor 4 Mutant and Null Mice Retain Morphine-Induced Tolerance, Hyperalgesia, and Physical Dependence

The *PLOS ONE* Staff

## Notice of Republication

This article was republished on June 3rd, 2014, due to the figures being ordered incorrectly in the previously published article. Additionally, the name of the fourth author now reads Christopher J. B. Nicol. Please download the PDF again to view the corrected article. The originally published, uncorrected article and the republished, corrected article are provided here for reference.

## Supporting Information

**File S1.** Originally published, uncorrected article.

(PDF)

**File S2.** Republished, corrected article.

(PDF)

## Reference

1. Mattioli TA, Leduc-Pessah H, Skelhorne-Gross G, Nicol CJB, Milne B, et al. (2014) Toll-Like Receptor 4 Mutant and Null Mice Retain Morphine-Induced Tolerance, Hyperalgesia, and Physical Dependence. *PLoS ONE* 9(5): e97361. doi:10.1371/journal.pone.0097361

---

**Citation:** The *PLOS ONE* Staff (2014) Correction: Toll-Like Receptor 4 Mutant and Null Mice Retain Morphine-Induced Tolerance, Hyperalgesia, and Physical Dependence. *PLoS ONE* 9(6): e101621. doi:10.1371/journal.pone.0101621

**Published:** June 24, 2014

**Copyright:** © 2014 The *PLOS ONE* Staff. This is an open-access article distributed under the terms of the Creative Commons Attribution License, which permits unrestricted use, distribution, and reproduction in any medium, provided the original author and source are credited.
